# Supplementary material for: AuPd bimetallic nanoparticles decorated on graphene nanosheets: their green synthesis, growth mechanism and high catalytic ability in 4-nitrophenol reduction
Source: Royal Society of Chemistry journal article supplement (doi:10.1039/c3ta15141g), 2014-01-01
Supplement: c3ta15141g1.pdf [file c3ta15141g1.pdf]

## Supporting information

### **AuPd bimetallic nanoparticles decorated on graphene nanosheets: their green synthesis, growth mechanism and high catalytic ability in 4-nitrophenol reduction**

*Xiaomei Chen,<sup>\*a,c</sup> Zhixiong Cai<sup>b</sup>, Xi Chen<sup>\*b</sup> and Munetaka Oyama<sup>c</sup>*

*<sup>a</sup>College of Biological Engineering, Jimei University, Xiamen, 361021, China.*

*<sup>b</sup>State Key Laboratory of Marine Environmental Science, Xiamen University, Xiamen, 361005, China*

*<sup>c</sup>Department of Material Chemistry, Graduate School of Engineering, Kyoto University, Nishikyo-ku, Kyoto, 615-8520, Japan*

Email: [xmchen@jmu.edu.cn](mailto:xmchen@jmu.edu.cn)

Fax: 86 592 6180470; Tel: 86 592 6181487

## Supplementary Results

### 1. The preparation of AuPdNPs/GNs

#### (1) Size distribution histogram

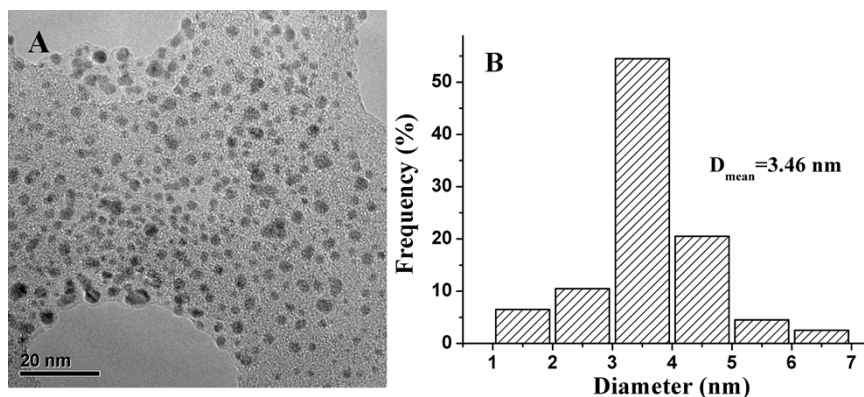

**Fig. S1** (A) TEM image and (B) particle size distribution histogram of AuPdNPs/GNs.

#### (2) GNs effect

In the synthesis of GNs, 10 mL as-prepared GO solution was mixed with 10 mL water, 5  $\mu\text{L}$  hydrazine solution (35 wt% in water) and 35  $\mu\text{L}$  ammonia solution (25 wt% in water) in a 50 mL glass vial. Other synthesis procedures were the same with those of AuNPs/GNs.

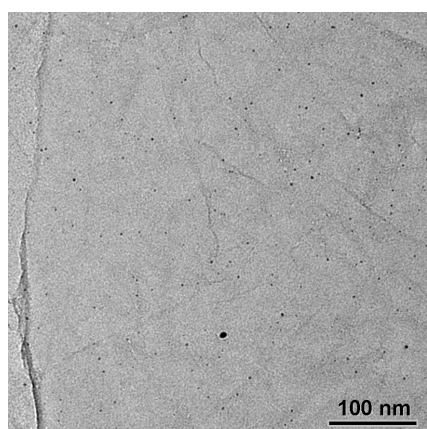

**Fig. S2** TEM image of AuPdNPs/GNs synthesized by GNs with low reducing capability.

### (3) XPS of C 1S

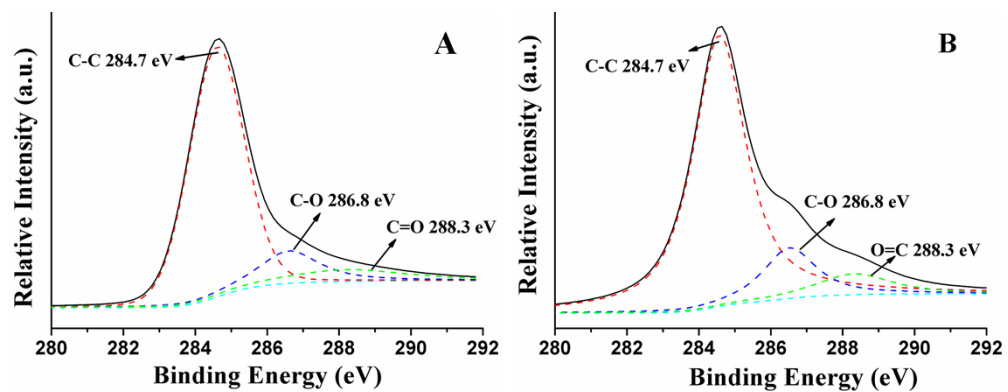

Fig. S3 The deconvoluted XPS spectra of C 1s (A) before and (B) after deposition of AuPdNPs

### (4) XPS of Pd 3d

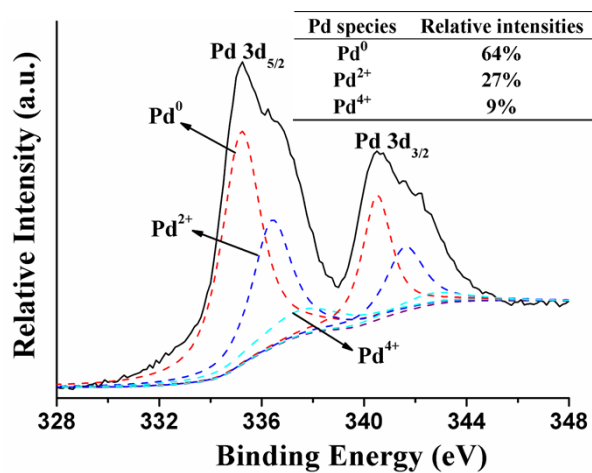

Fig. S4 The deconvoluted XPS spectra of Pd 3d.

## (5) Time effect

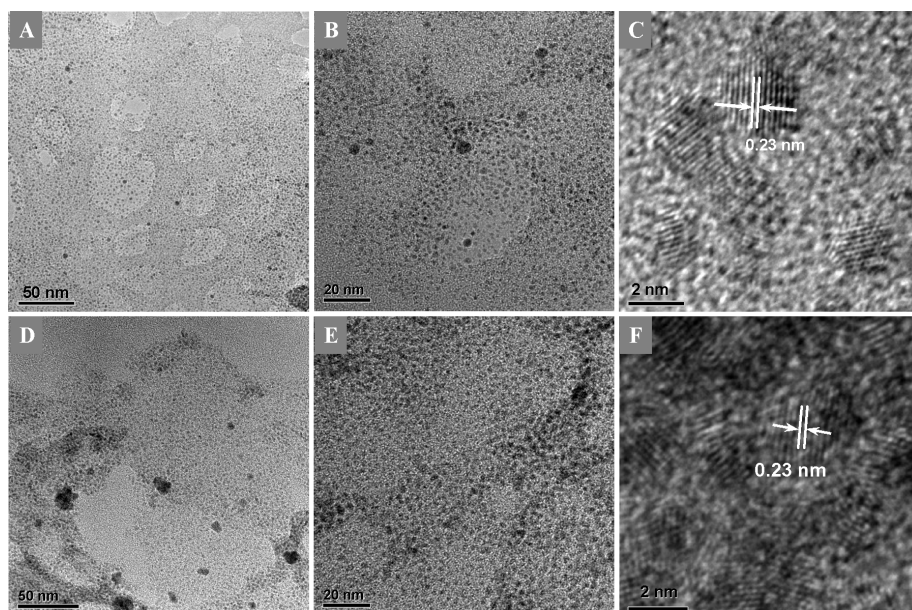

Fig. S5 TEM images of AuPdNPs/GNs stirring (A-C) for 5 min and (D-F) for 30 min.

## (6) Size of NPs based on XRD results

Table S1 Summary of the calculation parameters based on XRD result.

| Samples     | b    | $\theta$ | $D^*_{XRD}$ (nm) | $D_{TEM}$ (nm) |
|-------------|------|----------|------------------|----------------|
| AuPdNPs/GNs | 1.2° | 19.7°    | 6.94             | 3.46           |
| AuNPs/GNs   | 2.3° | 19°      | 3.61             | 3.15           |
| PdNPs/GNs   | 1.4° | 20.1°    | 5.96             | 2.67           |

\* $D_{XRD}$  is calculated according to Scherrer formula:  $D=0.89\lambda/(B\cos\theta)$ , where  $\lambda$  is equal to 0.154056 nm, and B is equal to  $\pi b/180^\circ$ .

## 2. Details for catalytic reaction of reduction of 4-NP.

### (1) Photo image

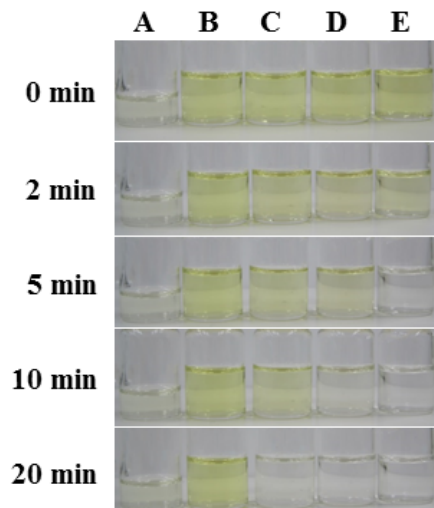

**Fig. S6** Photo images of the color changed during the reaction. A: 4-NP; B: 4-NP+ NaBH<sub>4</sub>; C: 4-NP+ NaBH<sub>4</sub>+AuNPs/GNs; D: 4-NP+ NaBH<sub>4</sub>+PdNPs/GNs; E: 4-NP+NaBH<sub>4</sub>+AuPdNPs/GNs.

## (2) UV-vis spectra

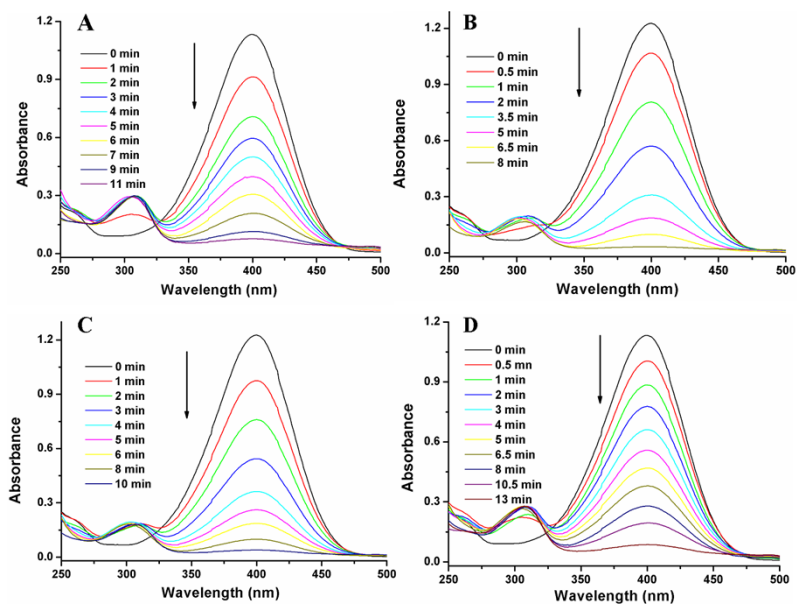

**Fig. S7** The time-dependent UV-vis absorption spectra of reduction 4-NP by NaBH<sub>4</sub> in the presence of (A) Au<sub>35</sub>Pd<sub>65</sub>NPs/GNs, (B) Au<sub>42</sub>Pd<sub>58</sub>NPs/GNs (C) Au<sub>71</sub>Pd<sub>29</sub>NPs/GNs and (D) Au<sub>82</sub>Pd<sub>18</sub>NPs/GNs.

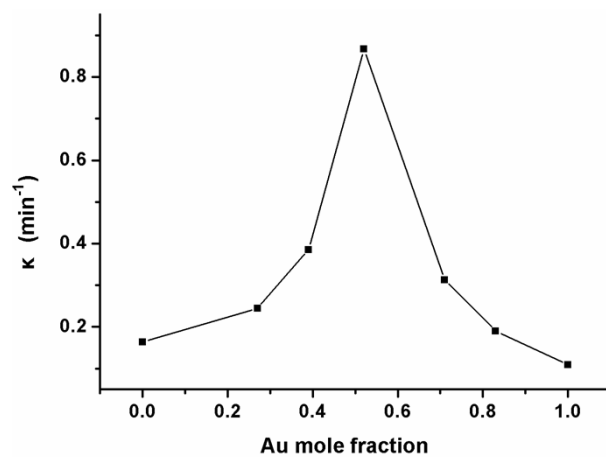

**Fig. S8** The rate constants of the reaction ( $\kappa$ ) versus mole fraction of Au for the AuPdNPs/GNs catalysts at different Au and Pd compositions.
